# Supplementary material for: Mycelium chemistry differs markedly between ectomycorrhizal and arbuscular mycorrhizal fungi
Source: PubMed Central journal article supplement (PMC9050698; doi:10.1038/s42003-022-03341-9), 2022-04-28
Supplement: 42003_2022_3341_MOESM2_ESM.pdf [file 42003_2022_3341_MOESM2_ESM.pdf]

## Supplementary Information

# **Mycelium chemistry differs markedly between ectomycorrhizal and arbuscular mycorrhizal fungi**

Weilin Huang<sup>1,2</sup>, Peter M. van Bodegom<sup>1</sup>, Stéphane Declerck<sup>3</sup>, Jussi Heinonsalo<sup>4,5</sup>, Marco Cosme<sup>3</sup>, Toni Viskari<sup>4</sup>, Jari Liski<sup>4</sup>, and Nadejda A. Soudzilovskaia<sup>1,2</sup>

<sup>1</sup>Environmental Biology, Institute of Environmental Sciences, Leiden University, Einsteinweg 2, 2333CC Leiden, the Netherlands.

<sup>2</sup>Centre for Environmental Sciences, Hasselt University, Martelarenlaan 42, 3500 Hasselt, Belgium.

<sup>3</sup>Mycology, Applied Microbiology, Earth and Life Institute, Université catholique de Louvain, 1348 Louvain-la-Neuve, Belgium.

<sup>4</sup>Climate System Research, Finnish Meteorological Institute, 00101 Helsinki, Finland.

<sup>5</sup>Department of Microbiology and Institute for Atmospheric and Earth System Research (INAR)/Forest Sciences, University of Helsinki, 00014 Helsinki, Finland.

*Correspondence to:* Weilin Huang (w.huang@cml.leidenuniv.nl)

**Table S1.** Samples of mycorrhizal fungi AM and EM with corresponding species names and CBS/MUL number (EM strains except *Scleroderma verrucosum* are all from CBS-KNAW collection, AM strains all from BBCM/MUCL). Single quotes' remarks for samples taken average values with multiple measurements. Star remarks\* are the calculation results for samples being tested with a mixture of standard litter. Medium recipes of EMF are according to the manual of Westerdijk Fungal Biodiversity Institute<sup>1</sup>.

| Sample      | Name      | CBS/MUL NO.                                         | Medium     | Drying Method           |                        |
|-------------|-----------|-----------------------------------------------------|------------|-------------------------|------------------------|
| EMF         | EM-1      | <i>Xerocomus rubellus</i>                           | CBS 230.66 | CHA4.7                  | Freeze Dryer           |
|             | EM-2'     | <i>Paxillus involutus</i>                           | CBS 100140 | MOD                     | Freeze Dryer           |
|             | EM-3'     | <i>Laccaria bicolor</i>                             | CBS 445.79 | CHA                     | Oven 55°C for 12 hours |
|             | EM-4      | <i>Inocybe rimosa</i>                               | CBS 210.55 | X agar                  | Oven 55°C for 12 hours |
|             | EM-5'     | <i>Hebeloma hiemale</i>                             | CBS 376.89 | MEA                     | Oven 55°C for 12 hours |
|             | EM-6      | <i>Lactarius deliciosus</i>                         | CBS 582.63 | BAF                     | Freeze Dryer           |
|             | EM-7      | <i>Phaeogyroporus sudanicus</i>                     | CBS 481.89 | MMN/MOD                 | Freeze Dryer           |
|             | EM-8      | <i>Peziza varia</i>                                 | CBS 115948 | OA                      | Freeze Dryer           |
|             | EM-9      | <i>Cortinarius cristallinus</i>                     | CBS 348.74 | MMN                     | Freeze Dryer           |
|             | EM-10     | <i>Peziza quelepidotia</i>                          | CBS 135943 | MYA/OA                  | Freeze Dryer           |
|             | EM-11*    | <i>Scleroderma verrucosum</i>                       | MUCL34674  | MMN                     | Oven 55°C for 12 hours |
| AMF         | AMF-1     | <i>Rhizohypagus clarus</i>                          | MUCL46238  | MSR                     | Freeze Dryer           |
|             | AMF-2     | <i>Rhizohypagus irregularis</i>                     | MUCL41833  | MSR                     | Freeze Dryer           |
|             | AMF-3*    | <i>Glomus aggregatum</i>                            | MUCL49408  | MSR                     | Freeze Dryer           |
|             | AMF-4     | <i>Glomus hoi</i>                                   | MUCL45686  | MSR                     | Freeze Dryer           |
| Supplements | Root_AMF* | Root tissue ( <i>D.carota</i> ) inoculated with AMF | -          |                         | Freeze Dryer           |
|             | Media-1'  | Media for AMF                                       | -          | A mixture of AMF medium | Oven 55°C for 12 hours |
|             | Media-2   | Media for EMF                                       | -          | A mixture of EMF medium | Oven 55°C for 12 hours |

**Table S2.** Chemical compositions of AM and EM fungi samples.

| Sample       |           | Name                                                | Fraction E | Fraction W | Fraction A | Fraction N |
|--------------|-----------|-----------------------------------------------------|------------|------------|------------|------------|
| EMF          | EM-1      | <i>Xerocomus rubellus</i>                           | 14.49      | 42.16      | 38.79      | 4.56       |
|              | EM-2'     | <i>Paxillus involutus</i>                           | 10.00      | 31.16      | 52.94      | 5.90       |
|              | EM-3'     | <i>Laccaria bicolor</i>                             | 11.53      | 31.61      | 53.40      | 3.46       |
|              | EM-4      | <i>Inocybe rimosa</i>                               | 14.65      | 40.13      | 42.88      | 2.34       |
|              | EM-5'     | <i>Hebeloma hiemale</i>                             | 15.00      | 42.84      | 36.00      | 6.15       |
|              | EM-6      | <i>Lactarius deliciosus</i>                         | 15.02      | 40.62      | 41.49      | 2.87       |
|              | EM-7      | <i>Phaeogyroporus sudanicus</i>                     | 10.71      | 48.54      | 35.09      | 5.67       |
|              | EM-8      | <i>Peziza varia</i>                                 | 14.30      | 37.29      | 46.86      | 1.55       |
|              | EM-9      | <i>Cortinarius cristallinus</i>                     | 16.26      | 40.23      | 40.74      | 2.77       |
|              | EM-10     | <i>Peziza quelepidotia</i>                          | 28.55      | 29.73      | 39.26      | 2.45       |
|              | EM-11*    | <i>Scleroderma verrucosum</i>                       | 18.10      | 16.90      | 48.89      | 16.11      |
| AMF          | AMF-1     | <i>Rhizohpagus clarus</i>                           | 8.15       | 18.47      | 72.65      | 0.73       |
|              | AMF-2     | <i>Rhizohpagus irregularis</i>                      | 7.89       | 18.48      | 72.61      | 1.02       |
|              | AMF-3*    | <i>Glomus aggregatum</i>                            | 11.59      | 15.95      | 61.46      | 11.00      |
|              | AMF-4     | <i>Glomus hoi</i>                                   | 8.54       | 19.97      | 70.71      | 0.78       |
| Supple-ments | Root_AMF* | Root tissue ( <i>D.carota</i> ) inoculated with AMF | 10.00      | 17.46      | 67.57      | 4.97       |
|              | Media-1'  | Media for AMF                                       | 7.98       | 13.61      | 77.90      | 0.51       |
|              | Media-2   | Media for EMF                                       | 0.16       | 96.42      | 0.00       | 0.00       |

**Table S3.** PerMANOVA results of chemical composition between mycorrhizal groups. 'Df' represent degrees of freedom; 'Sum Sq' represent sum of squares; 'Mean Sqs' represent mean of squares; 'Pseudo-F' represent F value by permutation. The P value <0.05 indicates statistical significance, based on 999 permutations, using Bray-Curtis method.

|           | Df | Sum Sq  | Mean Sqs | Pseudo-F | R <sup>2</sup> | P     |
|-----------|----|---------|----------|----------|----------------|-------|
| Strain    | 1  | 0.20063 | 0.200634 | 20.949   | 0.61708        | 0.001 |
| Residuals | 13 | 0.1245  | 0.009577 |          | 0.38292        |       |
| Total     | 14 | 0.32514 |          |          | 1              |       |

**Table S4.** WAEN chemical compositions of plant foliage litter obtained from CIDET and LIDET database.

| <b>SPECIES</b>                      | <b>W</b> | <b>A</b> | <b>E</b> | <b>N</b> | <b>Plantgrowth</b> |
|-------------------------------------|----------|----------|----------|----------|--------------------|
| <i>Abies amabilis</i>               | 31.36    | 29.18    | 13.21    | 26.26    | Evergreen Tree     |
| <i>Abies balsamea</i>               | 27.27    | 31.07    | 13.62    | 28.05    | Evergreen Tree     |
| <i>Abies concolor</i>               | 39.42    | 35.66    | 17.79    | 7.13     | Evergreen Tree     |
| <i>Abies lasiocarpa</i>             | 35.92    | 26.73    | 14.70    | 22.65    | Evergreen Tree     |
| <i>Abronia latifolia</i>            | 31.96    | 30.65    | 19.43    | 17.96    | Herb               |
| <i>Acer saccharum</i>               | 41.58    | 34.60    | 9.00     | 14.82    | Deciduous Tree     |
| <i>Alnus rugosa</i>                 | 32.03    | 38.48    | 8.50     | 20.99    | Deciduous Tree     |
| <i>Ammophila breviligulata</i>      | 21.72    | 57.34    | 6.45     | 14.50    | Herb               |
| <i>Betula lutea(alleghaniensis)</i> | 18.73    | 46.28    | 8.00     | 26.99    | Deciduous Tree     |
| <i>Betula papyrifera</i>            | 37.15    | 31.35    | 6.74     | 24.77    | Deciduous Tree     |
| <i>Bouteloua eriopoda</i>           | 13.44    | 65.66    | 5.13     | 15.77    | Herb               |
| <i>Bouteloua gracilis</i>           | 14.16    | 70.12    | 7.62     | 8.11     | Herb               |
| <i>Ceanothus greggii</i>            | 49.60    | 27.11    | 10.79    | 12.50    | Evergreen<br>Shrub |
| <i>Chamaecyparis nootkatensis</i>   | 26.50    | 33.10    | 16.58    | 23.83    | Evergreen Tree     |
| <i>Cornus nuttallii</i>             | 52.47    | 37.57    | 9.19     | 0.77     | Deciduous Tree     |
| <i>Drypetes glauca</i>              | 40.67    | 40.28    | 8.05     | 11.00    | Evergreen Tree     |
| <i>Epilobium angustifolium</i>      | 61.77    | 27.31    | 8.39     | 2.53     | Herb               |
| <i>Fagus grandifolia</i>            | 15.14    | 49.13    | 7.56     | 28.16    | Deciduous Tree     |
| <i>Festuca hallii</i>               | 14.05    | 63.87    | 9.89     | 12.19    | Herb               |
| <i>Gaultheria shallon</i>           | 27.53    | 36.28    | 8.53     | 27.67    | Evergreen<br>Shrub |
| <i>Gymnanthes lucida</i>            | 40.50    | 42.90    | 9.87     | 6.80     | Evergreen Tree     |
| <i>Kobresia myosuroides</i>         | 22.99    | 62.27    | 5.38     | 9.35     | Herb               |
| <i>Larix laricina</i>               | 31.16    | 30.95    | 11.55    | 26.34    | Deciduous Tree     |
| <i>Larix occidentalis</i>           | 34.10    | 34.54    | 10.10    | 21.27    | Evergreen Tree     |
| <i>Larrea tridentata</i>            | 32.05    | 41.15    | 18.73    | 8.07     | Evergreen<br>Shrub |
| <i>Liriodendron tulipifera</i>      | 44.83    | 32.17    | 14.20    | 8.81     | Deciduous Tree     |
| <i>Myrica cerifera</i>              | 29.64    | 30.44    | 12.98    | 26.94    | Evergreen<br>Shrub |
| <i>Picea abies</i>                  | 16.15    | 45.77    | 4.96     | 33.12    | Evergreen Tree     |
| <i>Picea engelmannii</i>            | 37.35    | 29.69    | 14.32    | 18.65    | Evergreen Tree     |
| <i>Picea glauca</i>                 | 31.77    | 37.11    | 8.69     | 22.44    | Evergreen Tree     |
| <i>Picea mariana</i>                | 29.72    | 34.49    | 12.81    | 22.98    | Evergreen Tree     |
| <i>Picea sitchensis</i>             | 20.30    | 40.44    | 10.63    | 28.63    | Evergreen Tree     |
| <i>Pinus banksiana</i>              | 15.64    | 43.56    | 7.15     | 33.66    | Evergreen Tree     |
| <i>Pinus contorta</i>               | 18.83    | 40.89    | 10.58    | 29.69    | Evergreen Tree     |
| <i>Pinus elliotii</i>               | 19.68    | 41.46    | 17.37    | 21.50    | Evergreen Tree     |
| <i>Pinus monticola</i>              | 32.60    | 33.66    | 9.10     | 24.65    | Evergreen Tree     |
| <i>Pinus ponderosa</i>              | 27.38    | 32.49    | 11.59    | 28.54    | Evergreen Tree     |

|                                  |       |       |       |       |                    |
|----------------------------------|-------|-------|-------|-------|--------------------|
| <i>Pinus resinosa</i>            | 18.46 | 42.74 | 14.81 | 23.99 | Evergreen Tree     |
| <i>Pinus strobus</i>             | 20.30 | 40.00 | 18.90 | 20.80 | Evergreen Tree     |
| <i>Pinus sylvestris</i>          | 15.50 | 49.10 | 10.62 | 24.78 | Evergreen Tree     |
| <i>Populus tremuloides</i>       | 33.65 | 38.99 | 10.05 | 17.31 | Deciduous Tree     |
| <i>Pseudotsuga menziesii</i>     | 18.59 | 40.41 | 12.38 | 28.62 | Evergreen Tree     |
| <i>Quercus ellipsoidalis</i>     | 25.90 | 41.20 | 7.40  | 25.60 | Deciduous Tree     |
| <i>Quercus prinus</i>            | 27.38 | 39.61 | 9.38  | 23.64 | Deciduous Tree     |
| <i>Quercus rubra</i>             | 24.48 | 40.93 | 5.84  | 28.76 | Deciduous Tree     |
| <i>Rhododendron macrophyllum</i> | 36.63 | 37.27 | 9.00  | 17.11 | Evergreen<br>Shrub |
| <i>Robinia pseudoacacia</i>      | 34.12 | 40.78 | 7.23  | 17.88 | Deciduous Tree     |
| <i>Schizachyrium gerardi</i>     | 14.94 | 60.30 | 5.95  | 18.81 | Herb               |
| <i>Schizachyrium scoparium</i>   | 9.13  | 69.05 | 3.79  | 18.03 | Herb               |
| <i>Spartina alterniflora</i>     | 27.36 | 60.46 | 4.95  | 7.24  | Herb               |
| <i>Taxus brevifolia</i>          | 16.50 | 32.46 | 9.80  | 41.25 | Evergreen Tree     |
| <i>Thuja occidentalis</i>        | 17.66 | 39.88 | 11.92 | 30.55 | Evergreen Tree     |
| <i>Thuja plicata</i>             | 18.78 | 38.36 | 13.06 | 29.80 | Evergreen Tree     |
| <i>Triticum aestivum</i>         | 6.76  | 73.59 | 3.36  | 16.29 | Herb               |
| <i>Tsuga heterophylla</i>        | 14.78 | 47.84 | 5.18  | 32.21 | Evergreen Tree     |
| <i>Tsuga mertensiana</i>         | 26.77 | 29.93 | 9.47  | 33.82 | Evergreen Tree     |
| <i>Vochysia ferraggenae</i>      | 30.77 | 43.57 | 7.47  | 18.20 | Evergreen Tree     |

**Table S5.** Effect sizes of chemical compositions differences among plant litters and mycorrhizal fungi.

|                          | Eta2             |            | Omega2           |            | Epsilon2         |            | Chen's f         |            |
|--------------------------|------------------|------------|------------------|------------|------------------|------------|------------------|------------|
|                          | Mycorrhiza fungi | Plant leaf | Mycorrhiza fungi | Plant leaf | Mycorrhiza fungi | Plant leaf | Mycorrhiza fungi | Plant leaf |
| <b>Water-soluble</b>     | 0.68             | 0.21       | 0.64             | 0.16       | 0.66             | 0.16       | 1.47             | 0.51       |
| <b>Acid-hydrolysable</b> | 0.76             | 0.41       | 0.73             | 0.38       | 0.74             | 0.38       | 1.77             | 0.84       |
| <b>Ethanol-soluble</b>   | 0.46             | 0.28       | 0.4              | 0.23       | 0.41             | 0.24       | 0.92             | 0.62       |
| <b>Non-hydrolysable</b>  | 0.26             | 0.20       | 0.2              | 0.15       | 0.21             | 0.15       | 0.6              | 0.49       |

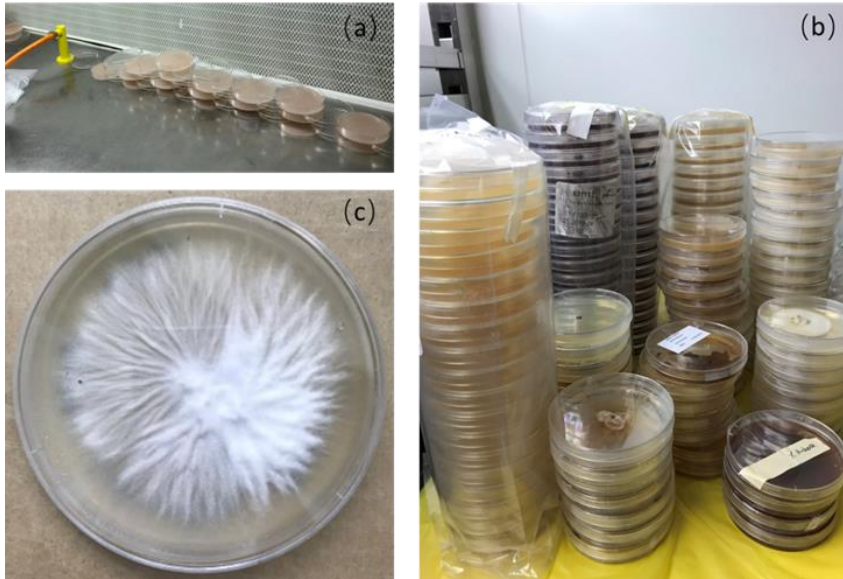

**Fig.S1 In vitro cultivation of ectomycorrhizal fungi.** (a) Medium preparation and inoculation under sterile conditions using laminar flow hood; (b) Inoculated EM fungi plates sealed and cultivated in the dark; (c) *Laccaria bicolor* cultivation on medium after 3weeks incubation in the dark (27°C).

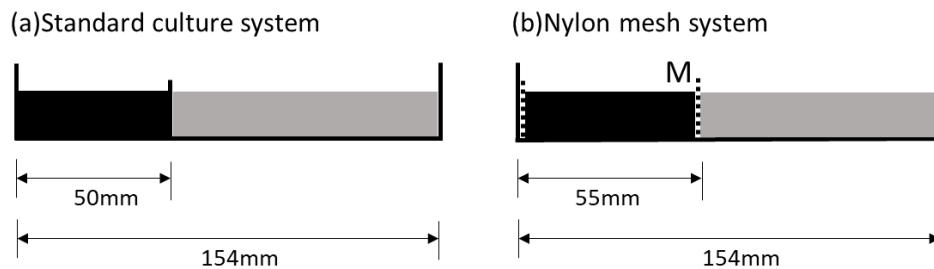

**Fig.S2 Schematic representation of two physically different autotrophic whole plant systems, S1 and S2.** The plant compartment is coloured black, the fungal compartment with the medium is coloured grey, the nylon mesh (M) is depicted as dashed line: (a) autotrophic whole plants system with a Petri (S1) root compartment; (b) autotrophic whole plants system with a mesh (S2) root compartment.

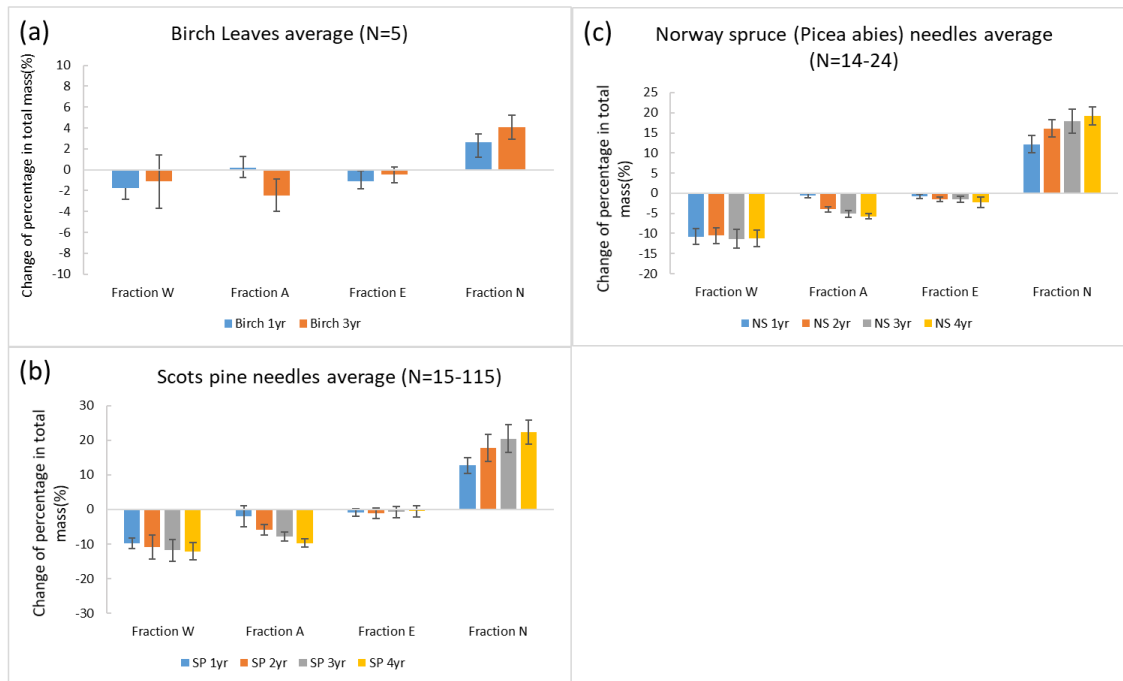

**Fig.S3 Chemical composition variation in decomposing plant litter.** (a) Chemical composition of WAEN in birch leaves (n=5) within 3 years, data from FMI litter decomposition experiment; (b) and (c), chemical composition of WAEN in needles of spruce (n=14-24) and pine (n=15-115) within 4 years decomposition, data from ED dataset.

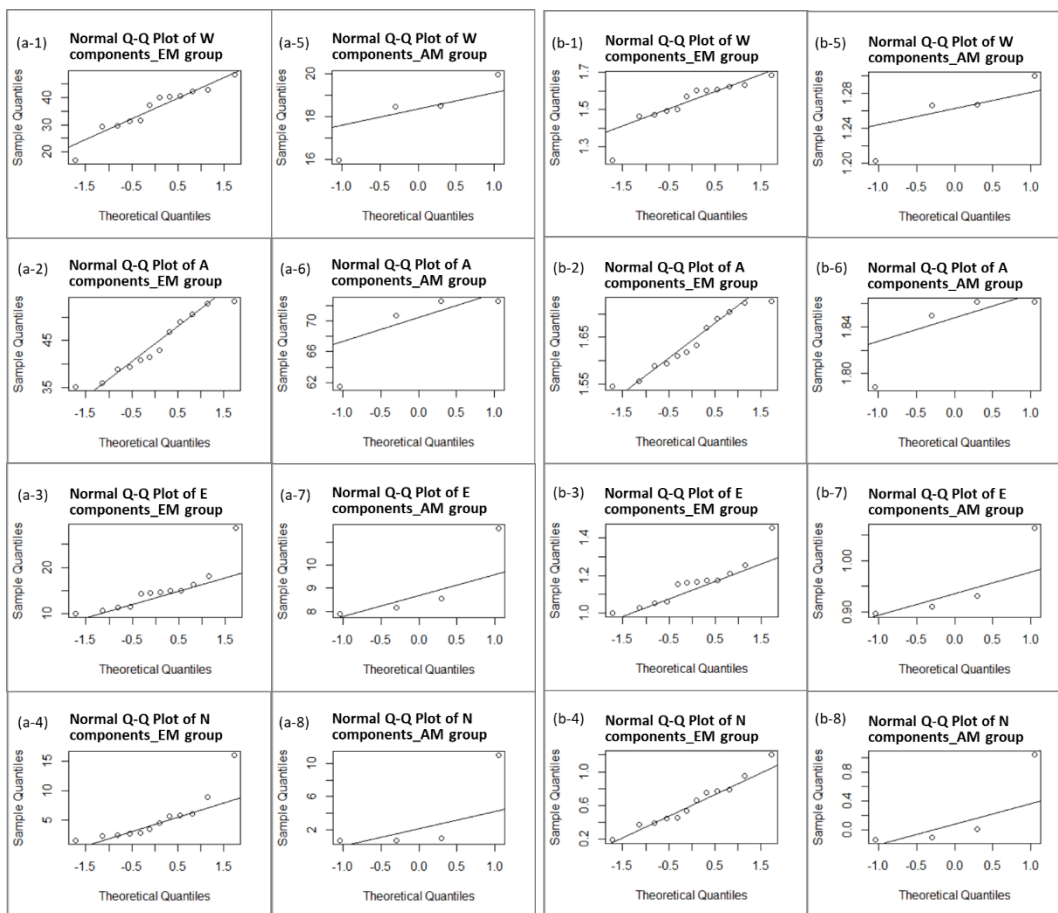

**Fig.S4 Distribution of each chemical composition data of AM and EM sample groups. (a) Original data (%); (b) Data were log(x+1) transformed.**



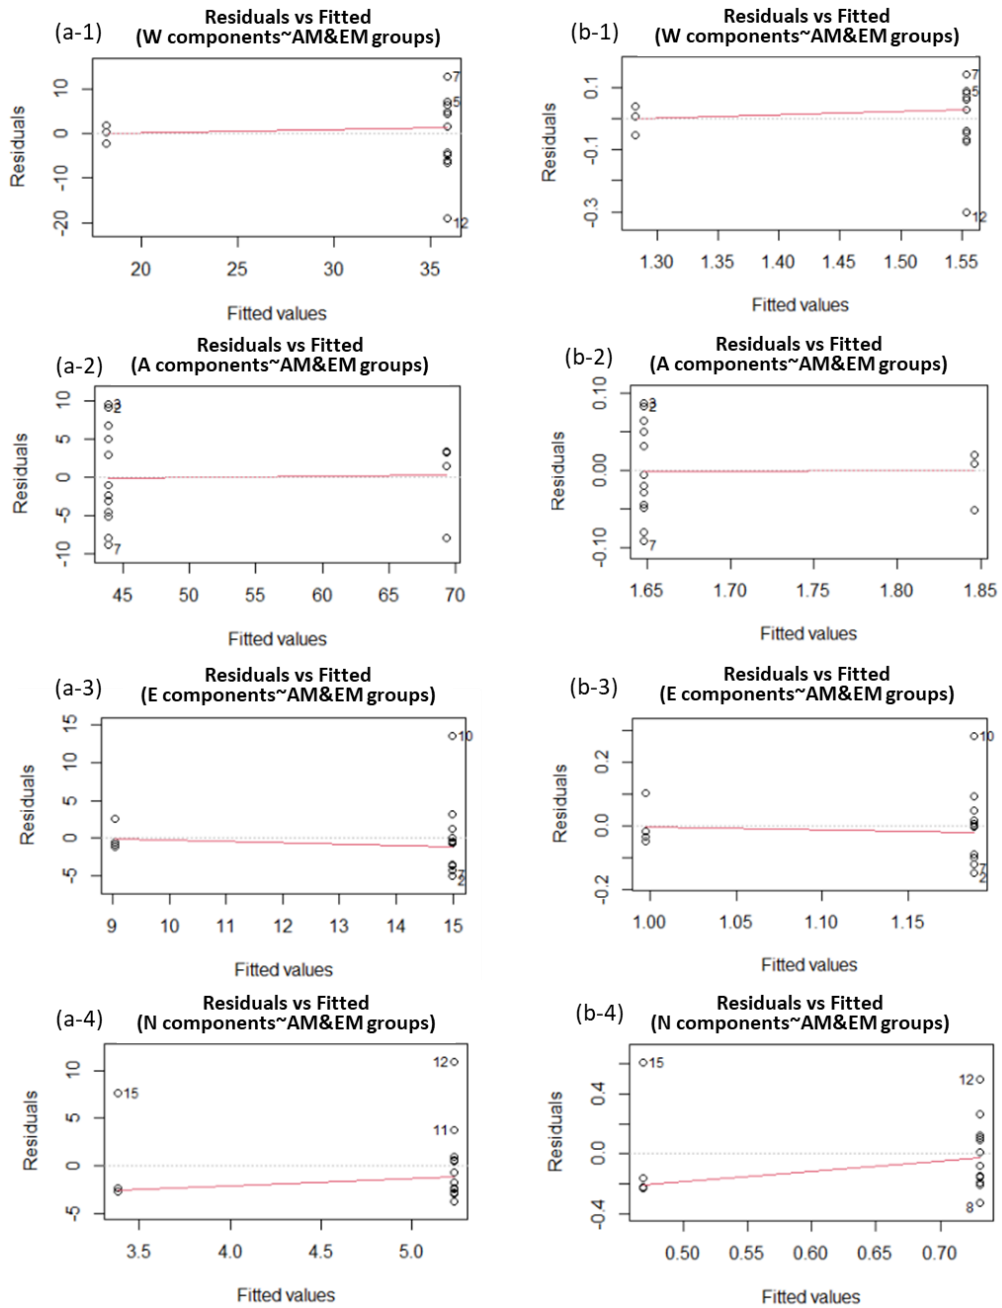

**Fig.S5 Homogeneity of variance of chemical composition data of AM and EM sample groups. (a) Original data of AM and EM sample groups; (b) Log-transformed data of AM and EM sample groups.**

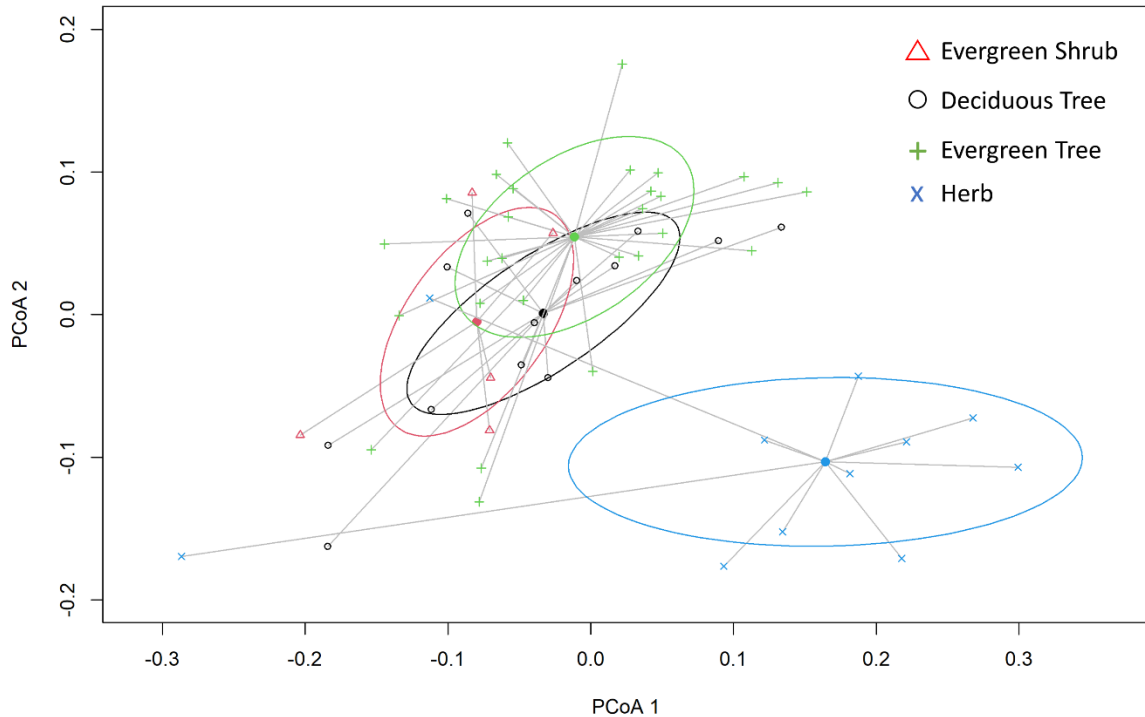

**Fig.S6 Clustering and centroids of four plant functional types in a multidimensional space of WAEN components.**

#### **Notes S1. Plant litter data and statistics**

We gathered plant leaf WAEN chemical composition data of 57 plant species from CIDET and LIDET datasets (Table S4). Data were averaged for species with multiple available measurements. Species were grouped into four functional types: evergreen tree, deciduous tree, evergreen shrub and herb, based on plant growth form information obtained from the TRY database<sup>2</sup>. Species with multiple growth form definitions were defined according to the highest occurrence frequency<sup>3</sup>. Following the ANOVA analysis to assess differences among plant functional types in WAEN parameters, we calculated effect size indices. This allowed us to compare the magnitude of the differences among WAEN of plants that belong to distinct PFTs to the differences among WAEN of AMF and EMF. As distinct effect size indices may yield different results, we opted to calculate four distinct indices: Eta<sup>2</sup>, Omega<sup>2</sup>, Epsilon<sup>2</sup> and Chen's *f* (Table S5). Comparison across all indices revealed that the differences in magnitude of difference in WAEN among vascular plants and mycorrhizal fungi are highly consistent, with effect sizes of differences among mycorrhizal guilds being always 1.5 to 4 times higher than the effect size of differences among plant functional types.

Besides, beta-dispersion was calculated to test if the dispersions, variances of the litter from different plant growth forms are significantly different. An ANOVA was performed to evaluate difference in group dispersions within the dataset of plant litter. The results ( $p=0.714$ ,  $F=0.714$ ,  $df=3$ ) shows that the group dispersions, or variances, are not significantly different from each other and the group dispersions are likely homogeneous between groups. We plot the dispersion for each group as shown in Fig.S6. As expected, since we have identified no significant differences, the

deciduous and evergreen groups have overlaps and are not distinct from each other. However, with further perMANOVA test, we found that even groups in plant litter have similar dispersions, their centroids are still significantly different ( $R^2=0.311$ ,  $p=0.001$ ,  $df=3$ ).

## Supplementary References

1. Crous, P. W., Verkley, G. J. M., Groenewald, J. Z. & Houbraken, J. *Westerdijk Laboratory Manual Series 1: Fungal Biodiversity*. (2019).
2. Kattge, J. *et al.* TRY - a global database of plant traits. *Glob. Chang. Biol.* **17**, 2905–2935 (2011).
3. Engemann, K. *et al.* A plant growth form dataset for the New World. *Ecology* **97**, 3243 (2016).
